# Supplementary material
Source: PubMed Central journal article supplement (PMC11028993)
Supplement: 262_2010_918_MOESM2_ESM.pdf [file 262_2010_918_MOESM2_ESM.pdf]

|           |                                                                    |               |      |      |              |             |      |      |             |          |      |      |             |          |      |      |              |             |            |             |         |         |         |         |         |         |         |         |         |         |         |         |         |         |         |
|-----------|--------------------------------------------------------------------|---------------|------|------|--------------|-------------|------|------|-------------|----------|------|------|-------------|----------|------|------|--------------|-------------|------------|-------------|---------|---------|---------|---------|---------|---------|---------|---------|---------|---------|---------|---------|---------|---------|---------|
| 1435976.1 | Receptor accessory protein 3                                       | Reep3         | 1.08 | 1.08 | 0.438398     | 0.999947    | 1.23 | 0.62 | 1.481791    | 0.999946 | 1.63 | 1.63 | 0.009729    | 0.999977 | 1.44 | 1.44 | 0.01486702   | 0.999993    | 245.69     | 401.85      | 301.24  | 434.98  | 303.79  | 245.69  | 183.74  | 426.46  | 379.04  | 301.24  | 343.32  | 369.34  | 450.32  | 434.98  | 402.82  |         |         |
| 1435978.1 | gelonin                                                            | Glon          | 2.28 | 2.28 | 6.8944E-07   | 0.0286921   | 2.30 | 0.44 | 0.00234584  | 0.999946 | 1.66 | 0.60 | 0.0137017   | 0.999979 | 1.66 | 0.60 | 0.00832742   | 0.999993    | 191.24     | 115.80      | 430.24  | 264.16  | 199.59  | 181.83  | 91.24   | 426.46  | 122.12  | 266.79  | 439.30  | 592.34  | 214.54  | 284.16  | 450.32  |         |         |
| 1448757.1 | deoxyuridylyltransferase, terminal                                 | Dnt3          | 1.06 | 1.06 | 0.5174486    | 0.999947    | 2.10 | 1.10 | 0.241790    | 0.999946 | 1.66 | 0.60 | 0.005614961 | 0.999979 | 1.34 | 0.75 | 0.02079300   | 0.999993    | 21.44      | 12.96       | 18.40   | 13.76   | 17.88   | 25.22   | 21.44   | 12.32   | 13.80   | 18.40   | 15.68   | 20.80   | 15.10   | 13.76   | 13.38   | 13.76   |         |
| 1448759.1 | RIKEN DNA C230088N1 gene                                           | C230088N1R1K  | 1.16 | 1.06 | 0.1700385    | 0.999947    | 1.17 | 2.10 | 0.000142929 | 0.999946 | 1.66 | 0.60 | 0.01215008  | 0.999979 | 1.09 | 1.09 | 0.3390931    | 0.999993    | 216.86     | 131.10      | 103.45  | 112.56  | 274.18  | 216.86  | 156.28  | 122.90  | 139.31  | 118.97  | 73.67   | 103.45  | 103.63  | 112.56  | 113.35  | 103.63  |         |
| 1448760.1 | spectrin beta 2                                                    | Sptb2         | 1.06 | 1.06 | 0.1768112    | 0.999947    | 1.16 | 1.06 | 0.1768112   | 0.999946 | 1.66 | 0.60 | 0.01215008  | 0.999979 | 1.09 | 1.09 | 0.3390931    | 0.999993    | 216.86     | 131.10      | 103.45  | 112.56  | 274.18  | 216.86  | 156.28  | 122.90  | 139.31  | 118.97  | 73.67   | 103.45  | 103.63  | 112.56  | 113.35  | 103.63  |         |
| 1445837.1 | Transcribed locus                                                  | Dn3           | 1.05 | 1.05 | 0.4487030    | 0.999947    | 1.09 | 1.79 | 0.003075    | 0.999946 | 1.67 | 1.01 | 0.005548653 | 0.999979 | 3.14 | 3.13 | 1.28880E-10  | 0.999993    | 62.98      | 106.36      | 35.27   | 110.23  | 74.85   | 62.98   | 25.22   | 41.17   | 106.66  | 35.27   | 34.11   | 41.17   | 102.80  | 131.33  | 110.23  | 102.80  |         |
| 1445163.1 | RIKEN DNA D730035F11 gene                                          | D730035F11R1K | 1.18 | 1.05 | 0.1496208    | 0.999947    | 2.00 | 2.00 | 0.00033740  | 0.999946 | 1.67 | 0.60 | 0.0408594   | 0.999979 | 1.01 | 1.01 | 0.0620897    | 0.999993    | 55.15      | 33.09       | 27.27   | 27.83   | 55.15   | 59.07   | 39.11   | 36.41   | 29.78   | 23.28   | 21.56   | 26.06   | 27.83   | 29.78   | 21.56   | 26.06   |         |
| 1458933.1 | sonic carrier family 22 (organic anion/cation SLC2a15)             | Scn2a15       | 1.01 | 0.99 | 0.995714     | 0.999947    | 1.35 | 1.35 | 0.09821042  | 0.999946 | 1.68 | 1.68 | 0.00461219  | 0.999979 | 2.25 | 2.25 | 1.5352E-07   | 0.000477014 | 82.85      | 139.70      | 61.31   | 138.09  | 210.30  | 110.01  | 82.85   | 60.71   | 154.68  | 124.71  | 61.31   | 58.47   | 64.88   | 122.81  | 157.70  | 138.09  |         |
| 1440312.1 | LOLV family member 7, elongation of luvE7                          | Elv7          | 1.00 | 1.00 | 0.5593196    | 0.999947    | 1.01 | 0.99 | 0.290327    | 0.999946 | 1.68 | 0.59 | 0.0174897   | 0.999979 | 1.69 | 0.59 | 0.00902349   | 0.999993    | 18.51      | 11.09       | 18.33   | 11.02   | 19.03   | 18.51   | 9.96    | 7.98    | 12.41   | 19.36   | 16.10   | 18.47   | 11.02   | 14.70   | 13.89   | 11.02   |         |
| 1436614.1 | Transcribed locus                                                  | Dn3           | 1.14 | 0.88 | 0.2142952    | 0.999947    | 1.01 | 0.99 | 0.518999    | 0.999946 | 1.68 | 1.68 | 0.00517544  | 0.999979 | 1.46 | 1.46 | 0.00510772   | 0.999993    | 119.46     | 202.36      | 120.63  | 176.57  | 119.46  | 146.09  | 74.98   | 227.20  | 177.72  | 138.58  | 120.63  | 111.31  | 186.56  | 159.23  | 176.57  | 120.63  |         |
| 1417513.1 | ectopic viral integration site 1                                   | Evis          | 1.59 | 1.59 | 0.093634018  | 0.999947    | 1.09 | 0.99 | 0.7586018   | 0.999946 | 1.68 | 1.68 | 0.00842401  | 0.999979 | 2.84 | 2.84 | 0.01198829   | 0.000374915 | 40.15      | 78.33       | 40.65   | 107.22  | 40.15   | 40.35   | 31.40   | 117.85  | 38.81   | 32.46   | 40.65   | 44.48   | 103.37  | 97.85   | 107.22  | 103.37  |         |
| 1423333.1 | endoplasmic reticulum-glucosyl transferase, alpha5                 | Erta5         | 1.88 | 1.88 | 0.3909245    | 0.999947    | 1.88 | 1.88 | 0.3909245   | 0.999946 | 1.66 | 1.66 | 0.00121508  | 0.999979 | 1.73 | 1.73 | 0.00121508   | 0.999993    | 68.24      | 126.41      | 68.24   | 126.41  | 68.24   | 68.24   | 68.24   | 68.24   | 68.24   | 68.24   | 68.24   | 68.24   | 68.24   | 68.24   | 68.24   | 68.24   | 68.24   |
| 1434591.1 | RIKEN DNA J73406K03 gene                                           | Zp862         | 1.40 | 1.40 | 0.001143613  | 0.999947    | 1.03 | 1.03 | 0.51817809  | 0.999946 | 1.70 | 1.70 | 0.008729402 | 0.999979 | 2.45 | 2.45 | 0.008729402  | 0.999993    | 69.04      | 120.61      | 136.28  | 220.15  | 69.04   | 70.70   | 55.64   | 145.35  | 91.88   | 89.89   | 136.37  | 137.09  | 253.87  | 191.38  | 253.87  | 191.38  | 253.87  |
| 1437017.1 | glia maturation factor, alpha6055 : similar to A480653 : LOC100438 | Gmf6055       | 1.44 | 1.44 | 0.000245338  | 0.999947    | 2.20 | 0.63 | 0.341311    | 0.999946 | 1.70 | 1.70 | 0.0123291   | 0.999979 | 2.21 | 2.21 | 2.93253E-07  | 0.01230519  | 90.26      | 153.57      | 108.29  | 239.84  | 102.57  | 90.26   | 85.66   | 152.14  | 155.01  | 102.57  | 102.42  | 308.24  | 114.96  | 247.25  | 230.88  | 239.84  |         |
| 1419194.1 | glia maturation factor, gamma4                                     | Gmf4          | 1.54 | 1.54 | 0.000547652  | 0.999947    | 1.68 | 0.60 | 0.87474E-05 | 0.999946 | 1.71 | 0.59 | 0.00055284  | 0.999979 | 1.99 | 0.50 | 0.00055284   | 0.999993    | 190.87     | 110.31      | 320.46  | 160.723 | 2198.13 | 1838.99 | 1908.57 | 107.150 | 1169.12 | 1022.51 | 308.49  | 3185.93 | 1648.23 | 1607.23 | 1588.13 | 1607.23 |         |
| 1429264.1 | RIKEN DNA C030044F11 gene                                          | C030044F11R1K | 1.19 | 0.84 | 0.3804919    | 0.999947    | 1.18 | 1.18 | 0.1370397   | 0.999946 | 1.72 | 0.58 | 0.003788416 | 0.999979 | 1.72 | 0.58 | 0.30497E-06  | 0.1351569   | 741.21     | 434.82      | 364.35  | 741.21  | 70.94   | 593.02  | 457.90  | 411.74  | 652.39  | 628.75  | 51.71   | 364.35  | 369.46  | 359.15  | 364.35  |         |         |
| 1416410.1 | platelet-activating factor acetylhydrolase, b, Palab1b3            | Palab1b3      | 2.36 | 2.36 | 0.394198E-07 | 0.0173862   | 1.95 | 0.51 | 0.000418791 | 0.999946 | 1.71 | 1.71 | 0.008427136 | 0.999979 | 2.07 | 2.07 | 1.74087E-07  | 0.07205046  | 89.00      | 154.48      | 178.78  | 359.68  | 89.00   | 90.73   | 78.68   | 186.81  | 181.31  | 127.85  | 138.57  | 171.88  | 359.68  | 359.68  | 359.68  |         |         |
| 1457094.1 | src homology 2 domain-containing transferase                       | Htk           | 1.03 | 1.03 | 0.1847785    | 0.999947    | 1.37 | 1.37 | 0.05249104  | 0.999946 | 1.71 | 1.71 | 0.0121801   | 0.999979 | 2.41 | 2.41 | 0.0121801    | 0.999993    | 164.74E-07 | 0.007018303 | 56.39   | 95.68   | 41.07   | 95.15   | 65.43   | 56.39   | 95.27   | 99.89   | 95.27   | 41.07   | 46.30   | 95.15   | 100.33  | 95.15   |         |
| 1426588.1 | RIKEN DNA T81047A019 gene                                          | T81047A019R1K | 1.28 | 1.78 | 0.003164735  | 0.999947    | 1.20 | 1.20 | 0.4957117   | 0.999946 | 1.72 | 1.72 | 0.000326024 | 0.999979 | 1.61 | 1.61 | 0.27602E-06  | 0.1132662   | 1722.67    | 2961.45     | 1430.17 | 2308.36 | 1722.67 | 1769.52 | 1219.43 | 3122.91 | 2799.98 | 1556.88 | 1300.02 | 1430.17 | 2358.88 | 2308.36 | 2051.36 | 2308.36 |         |
| 1447012.1 | ecotropic viral integration site 1                                 | Evis          | 1.00 | 1.00 | 0.3933372    | 0.999947    | 1.06 | 1.06 | 0.9146321   | 0.999946 | 1.72 | 0.58 | 0.00115514  | 0.999979 | 1.81 | 0.62 | 0.201251E-05 | 0.8018024   | 13.31      | 7.78        | 12.51   | 7.78    | 17.06   | 13.31   | 9.77    | 8.77    | 7.18    | 16.72   | 12.51   | 11.08   | 6.92    | 7.78    | 8.77    | 12.51   |         |
| 1427176.1 | IL2-inducible T cell kinase                                        | Itk           | 2.29 | 2.29 | 0.00864773   | 0.999947    | 1.37 | 1.37 | 0.1577719   | 0.999946 | 1.72 | 0.58 | 0.00170512  | 0.999979 | 1.11 | 1.11 | 0.05615986   | 0.999993    | 3107.75    | 1824.7      | 2693.19 | 2320.59 | 3305.11 | 281.72  | 3092.23 | 528.33  | 2180.77 | 2892.42 | 483.16  | 549.2   | 675.8   | 2603.04 | 3030.94 | 1625.94 | 2320.59 |
| 1427094.1 | polyoma integration site, epsilon 2 (p59)beta                      | Pim2          | 1.49 | 1.49 | 0.003383584  | 0.999947    | 1.16 | 0.86 | 0.187673    | 0.999946 | 1.73 | 0.58 | 0.00673328  | 0.999979 | 1.35 | 0.74 | 0.001673769  | 0.999993    | 423.32     | 248.35      | 483.16  | 385.10  | 512.81  | 423.32  | 300.11  | 287.29  | 209.42  | 483.16  | 549.2   | 675.8   | 385.25  | 317.92  | 365.71  | 365.71  |         |
| 1417216.1 | prolyl isomerase site 2                                            | Pim2          | 2.19 | 2.19 | 1.20682E-08  | 0.000533596 | 1.99 | 0.50 | 0.001203233 | 0.999946 | 1.73 | 0.58 | 0.001072782 | 0.999979 | 1.57 | 0.64 | 0.0133441    | 0.999993    | 304.93     | 176.57      | 607.18  | 366.10  | 366.10  | 304.93  | 294.37  | 331.10  | 179.28  | 250.92  | 370.33  | 607.18  | 824.03  | 386.10  | 426.83  | 371.97  | 607.18  |
| 1440217.1 | predicted gene, EC4343419                                          | Pim169b       | 1.06 | 1.46 | 0.000149479  | 0.999947    | 1.17 | 0.85 | 0.0575396   | 0.999946 | 1.73 | 1.73 | 0.00395663  | 0.999979 | 2.14 | 2.14 | 0.00834408   | 0.002412661 | 258.42     | 427.68      | 303.82  | 691.12  | 307.42  | 248.24  | 258.42  | 422.40  | 472.96  | 232.28  | 333.87  | 303.82  | 355.99  | 639.13  | 741.66  | 651.11  |         |
| 1440218.1 | TRIM21                                                             | Trim21        | 1.06 | 1.06 | 0.000149479  | 0.999947    | 1.17 | 0.85 | 0.0575396   | 0.999946 | 1.73 | 1.73 | 0.00395663  | 0.999979 | 2.14 | 2.14 | 0.00834408   | 0.002412661 | 258.42     | 427.68      | 303.82  | 691.12  | 307.42  | 248.24  | 258.42  | 422.40  | 472.96  | 232.28  | 333.87  | 303.82  | 355.99  | 639.13  | 741.66  | 651.11  |         |
| 1457915.1 | RIKEN DNA G833441219 gene                                          | G833441219R1K | 1.06 | 1.46 | 0.000149479  | 0.999947    | 1.21 | 0.83 | 0.0340641   | 0.999946 | 1.73 | 1.73 | 0.00364249  | 0.999979 | 1.43 | 1.43 | 0.00832148   | 0.999993    | 70.21      | 122.93      | 103.28  | 121.11  | 70.21   | 67.02   | 131.3   | 112.74  | 84.98   | 86.79   | 81.42   | 100.56  | 135.12  | 101.17  | 100.56  |         |         |
| 1427202.1 | RIKEN DNA G833442119R1K                                            | G833442119R1K | 1.39 | 1.39 | 0.002741134  | 0.999947    | 1.02 | 0.98 | 0.974017    | 0.999946 | 1.75 | 1.75 | 0.01059450  | 0.999979 | 2.37 | 2.37 | 1.24809E-09  | 5.428E-10   | 418.02     | 737.88      | 427.19  | 101.97  | 484.56  | 418.02  | 391.04  | 843.12  | 632.65  | 427.19  | 405.58  | 45.81   | 934.72  | 1105.23 | 1011.97 |         |         |
| 1457528.1 | sonic carrier family 4, sodium bicarbonate SLC2a12                 | Scn2a12       | 1.30 | 1.30 | 0.006734905  | 0.999947    | 2.52 | 2.52 | 0.00919807  | 0.999946 | 1.75 | 1.75 | 0.03640831  | 0.999979 | 3.39 | 3.39 | 1.61375E-09  | 7.00011E-05 | 279.80     | 488.25      | 119.96  | 376.05  | 279.80  | 337.92  | 141.48  | 509.20  | 469.31  | 139.36  | 89.19   | 110.96  | 372.64  | 376.05  | 382.92  | 376.05  |         |
| 1457529.1 | acid phosphatase 2, associating factor 1                           | Acph2         | 1.11 | 1.11 | 0.0001975    |             |      |      |             |          |      |      |             |          |      |      |              |             |            |             |         |         |         |         |         |         |         |         |         |         |         |         |         |         |         |

|           |                                                     |         |      |            |             |          |          |            |              |            |          |            |              |             |             |             |             |             |             |         |         |         |         |         |         |         |         |         |         |         |         |         |         |         |        |         |         |
|-----------|-----------------------------------------------------|---------|------|------------|-------------|----------|----------|------------|--------------|------------|----------|------------|--------------|-------------|-------------|-------------|-------------|-------------|-------------|---------|---------|---------|---------|---------|---------|---------|---------|---------|---------|---------|---------|---------|---------|---------|--------|---------|---------|
| 1445664_0 |                                                     | 1.38    | 0.73 | 0.04128888 | 0.999947    | 1.42     | 1.42     | 0.00474548 | 0.999948     | 2.10       | 2.10     | 0.00129439 | 0.999977     | 2.16        | 2.16        | 7.38258E-08 | 0.00312366  | 30.05       | 63.71       | 21.23   | 45.80   | 33.45   | 30.05   | 26.35   | 55.87   | 71.55   | 21.23   | 15.16   | 22.01   | 45.80   | 53.76   | 45.16   |         |         |        |         |         |
| 1445664_1 | adhesion molecule with Ig like domain 2             | Amig2   | 1.29 | 1.29       | 0.2277039   | 0.999947 | 1.30     | 1.30       | 0.146171     | 0.999946   | 2.11     | 0.47       | 0.00074149   | 0.999979    | 1.26        | 0.79        | 0.01229612  | 0.00359963  | 250.58      | 123.22  | 193.49  | 153.25  | 276.71  | 250.58  | 110.62  | 96.88   | 155.45  | 179.79  | 163.49  | 21.01   | 69.23   | 153.25  | 170.79  |         |        |         |         |
| 1448026_0 | chromodomain helix-turn-alpha DNA binding protein 2 | Ctcf2   | 1.10 | 1.10       | 0.2741891   | 0.999947 | 1.05     | 1.05       | 0.9909018    | 0.999946   | 2.11     | 0.47       | 0.00030078   | 0.999979    | 1.83        | 0.55        | 8.62591E-07 | 0.00352685  | 693.87      | 330.49  | 662.37  | 361.48  | 737.49  | 524.09  | 693.87  | 290.96  | 370.01  | 61.27   | 662.37  | 684.00  | 346.17  | 361.48  | 370.00  | 46.16   |        |         |         |
| 1428097_0 | RIKEN cDNA 25100067D gene                           | Zstc1   | 1.05 | 1.05       | 0.95        | 0.991021 | 0.999947 | 1.07       | 1.07         | 0.00429393 | 0.999946 | 2.11       | 2.11         | 0.00240353  | 0.999979    | 2.97        | 2.97        | 3.73416E-10 | 1.63194E-06 | 146.61  | 31.07   | 99.20   | 266.73  | 162.09  | 141.85  | 146.61  | 281.17  | 162.09  | 141.85  | 162.09  | 141.85  | 162.09  | 296.73  | 310.67  | 290.74 |         |         |
| 1441186_0 | transducin-like enhancer of split 4, homolog 1      | Ednra   | 1.16 | 1.16       | 0.0000000   | 0.999947 | 1.50     | 1.50       | 0.0000000    | 0.999946   | 2.11     | 2.11       | 0.0000000    | 0.999979    | 1.50        | 1.50        | 0.0000000   | 0.999979    | 1503.46     | 1065.48 | 1202.63 | 1065.48 | 1503.46 | 1065.48 | 1202.63 | 1065.48 | 70.23   | 1065.48 | 1065.48 | 70.23   | 1065.48 | 1065.48 | 70.23   | 1065.48 |        |         |         |
| 1452553_0 | glialosyne protein                                  | Galm    | 1.66 | 1.66       | 1.33077E-05 | 0.999946 | 1.50     | 1.50       | 0.67106478   | 0.999946   | 2.12     | 2.12       | 0.00198837   | 0.999979    | 2.34        | 2.34        | 2.25022E-02 | 0.000967718 | 69.57       | 14.07   | 104.42  | 244.26  | 99.15   | 53.94   | 69.57   | 146.81  | 148.00  | 90.10   | 109.57  | 104.42  | 234.60  | 244.26  | 277.85  | 277.85  |        |         |         |
| 1452554_0 | SEC14 and septin domain 1                           | Seas1   | 1.25 | 1.25       | 0.055679    | 0.999947 | 1.02     | 1.02       | 0.6747223    | 0.999946   | 2.13     | 0.47       | 0.00051471   | 0.999979    | 1.67        | 0.60        | 0.00053181  | 0.999979    | 117.24      | 56.18   | 114.78  | 68.93   | 117.24  | 150.41  | 102.82  | 56.95   | 64.31   | 114.78  | 116.24  | 95.51   | 59.97   | 68.93   | 69.00   | 68.93   |        |         |         |
| 1434210_0 | insulin-rich repeats and immunoglobulin-L1          | Lig1    | 1.35 | 1.35       | 0.0173629   | 0.999947 | 1.32     | 1.32       | 0.0572285    | 0.999946   | 2.15     | 2.15       | 0.283637E-05 | 0.999979    | 3.80        | 3.80        | 2.97703E-11 | 1.31263E-06 | 425.79      | 914.17  | 323.08  | 1228.78 | 529.73  | 425.79  | 348.85  | 81.71   | 1002.62 | 367.28  | 279.43  | 323.08  | 1017.55 | 1234.13 | 1228.78 | 1228.78 |        |         |         |
| 1428987_0 | Epidermal growth factor receptor 3                  | Cyfr3   | 1.61 | 1.61       | 0.0000000   | 0.999947 | 1.50     | 1.50       | 0.0000000    | 0.999946   | 2.15     | 2.15       | 0.0000000    | 0.999979    | 1.50        | 1.50        | 0.0000000   | 0.999979    | 150.00      | 100.00  | 100.00  | 100.00  | 150.00  | 100.00  | 100.00  | 100.00  | 100.00  | 100.00  | 100.00  | 100.00  | 100.00  | 100.00  | 100.00  | 100.00  | 100.00 |         |         |
| 1428987_1 | insulin-like growth factor 1 receptor               | Igf1r   | 1.62 | 1.62       | 2.4132E-05  | 0.999878 | 3.30     | 3.30       | 5.0879E-05   | 0.999946   | 2.15     | 2.15       | 0.00166445   | 0.999979    | 12.91       | 12.91       | 2.88665E-15 | 1.29355E-10 | 186.70      | 54.14   | 367.11  | 731.11  | 20.10   | 146.70  | 88.20   | 66.75   | 287.06  | 45.29   | 56.61   | 73.77   | 73.11   | 60.58   | 71.16   | 60.58   | 71.16  |         |         |
| 1433934_0 | SEC2 related gene family, member A (S. Sec24a)      | Sec24a  | 1.32 | 1.32       | 0.7616313   | 0.999947 | 1.58     | 1.58       | 0.8467027    | 0.999946   | 2.15     | 2.15       | 0.00013738   | 0.999979    | 2.58        | 2.58        | 2.08155E-08 | 0.000807346 | 485.63      | 105.82  | 307.77  | 794.46  | 485.63  | 565.70  | 314.73  | 118.99  | 91.67   | 397.93  | 307.77  | 289.74  | 882.44  | 791.24  | 882.44  | 791.24  |        |         |         |
| 1420272_0 | BHD interacting domain death agonist                | Samhd1  | 1.84 | 1.84       | 0.00032987  | 0.999947 | 1.09     | 1.09       | 0.940807     | 0.999946   | 2.16     | 2.16       | 0.00026661   | 0.999979    | 1.08        | 1.08        | 0.1943489   | 0.999979    | 36.70       | 79.30   | 39.86   | 42.92   | 36.70   | 79.30   | 43.06   | 36.70   | 84.36   | 39.86   | 36.90   | 40.11   | 42.92   | 49.40   | 42.92   | 49.40   |        |         |         |
| 1441926_0 | transmembrane inner ear                             | Tric2   | 1.04 | 1.04       | 0.0000000   | 0.999947 | 1.00     | 1.00       | 0.0000000    | 0.999946   | 2.16     | 2.16       | 0.0000000    | 0.999979    | 1.00        | 1.00        | 0.0000000   | 0.999979    | 1.00        | 1.00    | 1.00    | 1.00    | 1.00    | 1.00    | 1.00    | 1.00    | 1.00    | 1.00    | 1.00    | 1.00    | 1.00    | 1.00    | 1.00    | 1.00    | 1.00   |         |         |
| 1442278_0 | solute carrier family 20, member 1                  | Slc20a1 | 1.12 | 1.12       | 0.2227093   | 0.999947 | 1.54     | 1.54       | 0.0243269    | 0.999946   | 2.19     | 0.46       | 0.00019819   | 0.999979    | 1.66        | 1.66        | 5.61122E-05 | 0.999933    | 203.98      | 96.31   | 62.12   | 103.22  | 208.11  | 203.98  | 135.57  | 116.22  | 73.41   | 62.12   | 52.72   | 72.96   | 101.16  | 103.22  | 116.16  | 103.22  | 116.16 |         |         |
| 1429719_0 | RIKEN cDNA E430004ND4 gene                          | Tspa    | 1.28 | 1.28       | 0.1120251   | 0.999947 | 2.03     | 2.03       | 0.00202339   | 0.999946   | 2.21     | 0.45       | 0.00126027   | 0.999979    | 3.71        | 0.27        | 7.33417E-10 | 3.18972E-05 | 117.93      | 53.27   | 239.91  | 64.81   | 147.37  | 217.93  | 80.12   | 58.27   | 48.87   | 239.91  | 261.62  | 197.80  | 78.93   | 64.81   | 57.00   | 64.81   | 57.00  |         |         |
| 1429719_1 | transducin-like enhancer of split 4, homolog 1      | Ednra   | 1.33 | 1.33       | 0.0000000   | 0.999947 | 1.50     | 1.50       | 0.0000000    | 0.999946   | 2.21     | 2.21       | 0.0000000    | 0.999979    | 1.50        | 1.50        | 0.0000000   | 0.999979    | 150.00      | 100.00  | 100.00  | 100.00  | 150.00  | 100.00  | 100.00  | 100.00  | 100.00  | 100.00  | 100.00  | 100.00  | 100.00  | 100.00  | 100.00  | 100.00  | 100.00 | 100.00  |         |
| 1434843_0 | RIKEN cDNA 2100100L5 gene                           | Mfcd8   | 1.11 | 1.11       | 0.9011811   | 0.999947 | 1.12     | 1.12       | 0.9219233    | 0.999946   | 2.25     | 0.45       | 0.00017682   | 0.999979    | 2.22        | 0.45        | 0.00017682  | 0.999979    | 116.44      | 52.49   | 103.68  | 468.82  | 116.44  | 52.49   | 103.68  | 468.82  | 116.44  | 52.49   | 103.68  | 468.82  | 116.44  | 52.49   | 103.68  | 468.82  | 116.44 | 52.49   |         |
| 1440609_0 | transducin-like enhancer of split 4, homolog 1      | Ednra   | 1.29 | 1.29       | 0.3431323   | 0.999947 | 1.22     | 1.22       | 0.0362987    | 0.999946   | 2.25     | 2.25       | 0.000151418  | 0.999979    | 3.55        | 3.55        | 4.51571E-11 | 1.98785E-06 | 17.55       | 42.58   | 14.34   | 50.82   | 17.55   | 42.58   | 14.34   | 50.82   | 17.55   | 42.58   | 14.34   | 50.82   | 17.55   | 42.58   | 14.34   | 50.82   | 17.55  | 42.58   |         |
| 1439449_0 | special T-rich sequence binding protein 1 Sbt1      | Sbt1    | 1.40 | 1.40       | 0.00536733  | 0.999947 | 2.69     | 2.69       | 2.74955E-08  | 0.0122652  | 2.26     | 2.26       | 0.68734E-06  | 0.3057681   | 1.17        | 0.85        | 4.22776E-04 | 0.999933    | 2681.52     | 1187.84 | 96.36   | 847.85  | 3051.32 | 2507.10 | 2681.52 | 1235.39 | 1140.29 | 1180.77 | 813.74  | 96.36   | 847.85  | 977.94  | 516.08  | 847.85  |        |         |         |
| 1428971_0 | single finger protein 52                            | Zfp52   | 1.04 | 1.04       | 0.6040738   | 0.999947 | 1.29     | 1.29       | 0.7710184623 | 0.999946   | 2.26     | 2.26       | 0.000161343  | 0.999979    | 1.69        | 1.69        | 0.00529927  | 0.999933    | 33.91       | 78.81   | 43.80   | 73.86   | 33.91   | 78.81   | 43.80   | 73.86   | 33.91   | 78.81   | 43.80   | 73.86   | 33.91   | 78.81   | 43.80   | 73.86   | 33.91  | 78.81   |         |
| 1456341_0 | Krupp-like factor 9; RIKEN cDNA 23100109I gene      | Klf9    | 1.46 | 1.46       | 0.691004384 | 0.999947 | 1.35     | 1.35       | 0.032298     | 0.999946   | 2.27     | 2.27       | 0.134352E-05 | 0.999979    | 2.11        | 2.11        | 1.12525E-06 | 0.0461471   | 177.54      | 402.79  | 131.21  | 274.34  | 177.54  | 214.70  | 145.64  | 246.82  | 306.98  | 97.48   | 131.21  | 153.23  | 241.89  | 241.89  | 241.89  | 241.89  | 241.89 |         |         |
| 1429196_0 | RbGTPase activating protein 1-like                  | Ragap11 | 1.03 | 1.03       | 0.0073841   | 0.999947 | 1.07     | 1.07       | 0.000330235  | 0.999946   | 2.27     | 2.27       | 0.000330235  | 0.999979    | 1.36        | 1.36        | 0.001642009 | 0.999933    | 39.25       | 91.576  | 67.24   | 81.24   | 39.25   | 91.576  | 67.24   | 81.24   | 39.25   | 91.576  | 67.24   | 81.24   | 39.25   | 91.576  | 67.24   | 81.24   | 39.25  | 91.576  |         |
| 1442537_0 | nicotinic acetylcholine receptor subunit alpha 2    | Chr2    | 1.07 | 1.07       | 0.117291    | 0.999947 | 1.77     | 1.77       | 0.0585193    | 0.999946   | 2.28     | 2.28       | 2.83307E-05  | 0.999979    | 3.51        | 2.21        | 2.5498E-12  | 1.11508E-07 | 765.40      | 1762.23 | 421.89  | 151.768 | 765.40  | 1762.23 | 421.89  | 151.768 | 765.40  | 1762.23 | 421.89  | 151.768 | 765.40  | 1762.23 | 421.89  | 151.768 | 765.40 | 1762.23 |         |
| 1445600_0 | hemocompatibility 2, C region beta locus            | H2-Cb   | 1.29 | 1.29       | 0.7616313   | 0.999947 | 2.32     | 2.32       | 0.000703E-05 | 0.999946   | 2.29     | 2.29       | 2.51193E-05  | 0.999979    | 4.14        | 4.14        | 1.23305E-04 | 5.41138E-06 | 222.13      | 517.74  | 95.55   | 395.19  | 222.13  | 517.74  | 95.55   | 395.19  | 222.13  | 517.74  | 95.55   | 395.19  | 222.13  | 517.74  | 95.55   | 395.19  | 222.13 | 517.74  |         |
| 1427736_0 | nicotinic (C-m) receptor 2                          | Chr2    | 1.02 | 1.02       | 0.9889826   | 0.999947 | 2.32     | 2.32       | 0.000141047  | 0.999946   | 2.29     | 2.29       | 0.000187087  | 0.999979    | 1.01        | 1.01        | 0.670387    | 0.999933    | 53.00       | 121.85  | 111.87  | 119.62  | 53.00   | 121.85  | 111.87  | 119.62  | 53.00   | 121.85  | 111.87  | 119.62  | 53.00   | 121.85  | 111.87  | 119.62  | 53.00  | 121.85  |         |
| 1448724_0 | cytokine inducible SH2-containing protein           | Cis1    | 1.34 | 1.34       | 0.000448312 | 0.999947 | 1.48     | 1.48       | 0.0244919    | 0.999946   | 2.24     | 2.43       | 2.43         | 5.44124E-10 | 2.37402E-06 | 78.40       | 1792.07     | 86.71       | 239.55      | 78.40   | 1792.07 | 86.71   | 239.55  | 78.40   | 1792.07 | 86.71   | 239.55  | 78.40   | 1792.07 | 86.71   | 239.55  | 78.40   | 1792.07 | 86.71   | 239.55 | 78.40   | 1792.07 |
| 1448724_1 | transducin-like enhancer of split 4, homolog 1      | Ednra   | 1.29 | 1.29       | 0.3431323   | 0.999947 | 1.22     | 1.22       | 0.0362987    | 0.999946   | 2.25     | 2.25       | 0.000151418  | 0.999979    | 3.55        | 3.55        | 4.51571E-11 | 1.98785E-06 | 17.55       | 42.58   | 14.34   | 50.82   | 17.55   | 42.58   | 14.34   | 50.82   | 17.55   | 42.58   | 14.34   | 50.82   | 17.55   | 42.58   | 14.34   | 50.82   | 17.55  | 42.58   |         |
| 1428711_0 | male sterility domain containing 2                  | Gai1    | 1.09 | 1.09       | 0.4979249   | 0.999947 | 1.49     | 1.49       | 0.0348419    | 0.999946   | 2.30     | 2.30       | 0.00049683   | 0.999979    | 3.14        | 3.14        | 5.40554E-04 | 0.00023276  | 168.75      | 399.85  | 113.13  | 359.69  | 168.75  | 399.85  | 113.13  | 359.69  | 168.75  | 399.85  | 113.13  | 359.69  | 168.75  | 399.85  | 113.13  | 359.69  | 168.75 | 399.85  |         |
| 1437421_0 | Transcribed locus                                   |         | 1.36 | 1.36       | 0.0118377   | 0.999947 | 1.90     | 1.90       | 0.01405229   | 0.999946   | 2.30     | 2.30       | 0.000473518  | 0.999979    | 1.65        | 1.65        | 0.00186153  | 0.999979    | 78.03       | 179.90  | 148.21  | 245.11  | 78.03   | 179.90  | 148.21  | 245.11  | 78.03   | 179.90  | 148.21  | 245.11  | 78.03   | 179.90  | 148.21  | 245.11  | 78.03  | 179.90  |         |
| 1454809_0 | nuclear receptor coactivator 7                      | Ncoa7   | 1.02 | 1.02       | 0.765227    | 0.999947 | 1.30     | 1.30       | 0.7710184623 | 0.999946   | 2.31     | 2.31       | 6.42456E-05  | 0.2862084   | 1.80        | 1.80        | 1.80563E-07 | 0.007607126 | 68.01       | 157.21  | 11.81   | 182.25  | 68.01   | 157.21  | 11.81   | 182.25  | 68.01   | 157.21  | 11.81   | 182.25  | 68.01   | 157.21  | 11.81   | 182.25  | 68.01  | 157.21  |         |
| 1454809_1 | nuclear receptor coactivator 7                      | Ncoa7   | 1.02 | 1.02       | 0.765227    | 0.999947 | 1.30     | 1.30       | 0.771018     |            |          |            |              |             |             |             |             |             |             |         |         |         |         |         |         |         |         |         |         |         |         |         |         |         |        |         |         |

|           |                                                               |      |      |              |             |           |      |              |             |           |      |              |             |             |      |             |              |             |         |         |         |         |         |         |         |         |         |          |         |         |         |         |         |        |
|-----------|---------------------------------------------------------------|------|------|--------------|-------------|-----------|------|--------------|-------------|-----------|------|--------------|-------------|-------------|------|-------------|--------------|-------------|---------|---------|---------|---------|---------|---------|---------|---------|---------|----------|---------|---------|---------|---------|---------|--------|
| 1454798.0 | ADP-ribosylation factor-like 4C - similar to AdicL1-LOC332433 | 1.70 | 1.70 | 2.68395E-06  | 0.11361847  | 1.07      | 0.83 | 0.3411345    | 0.9999446   | 2.92      | 3.4  | 3.17054E-08  | 0.001380701 | 1.84        | 0.54 | 4.68958E-08 | 0.001893741  | 3793.56     | 1300.35 | 4078.17 | 2212.29 | 4047.73 | 3645.61 | 3793.96 | 1290.33 | 1310.38 | 3652.05 | 4076.17  | 5144.48 | 2212.29 | 2183.89 | 2316.31 |         |        |
| 1422770.0 | prostate transmembrane protein, androgen-PRK3                 | 1.05 | 1.05 | 0.30564      | 0.9999947   | 1.05      | 0.95 | 0.5678222    | 0.9999446   | 2.92      | 2.92 | 8.80043E-06  | 0.000000000 | 2.93        | 2.93 | 1.29404E-07 | 0.534096E-06 | 107.58      | 564.00  | 207.17  | 607.21  | 197.58  | 176.44  | 204.18  | 627.02  | 495.27  | 239.97  | 18.16    | 207.47  | 715.84  | 807.00  | 607.21  |         |        |
| 1443917.0 | inhibitor of DNA binding 2, K2                                | 1.27 | 1.27 | 0.000000000  | 0.9999447   | 1.61      | 0.62 | 0.0113379    | 0.9999446   | 2.93      | 3.4  | 1.02467E-06  | 0.045814217 | 3.71        | 0.27 | 1.12941E-12 | 0.31583E-07  | 1776.97     | 615.17  | 2863.67 | 772.51  | 1776.97 | 2415.04 | 1501.97 | 713.77  | 516.58  | 3352.23 | 2863.67  | 2123.05 | 609.60  | 772.51  | 768.33  |         |        |
| 1448493.1 | coagulation factor II (thrombin) propeptide H2                | 1.25 | 1.25 | 0.162685E-05 | 0.6738624   | 1.07      | 0.56 | 0.003024490  | 0.9999446   | 2.93      | 3.4  | 7.2475E-07   | 0.000000000 | 3.07        | 0.33 | 1.36306E-11 | 1.56657E-07  | 216.29      | 106.33  | 881.28  | 179.17  | 500.78  | 297.57  | 316.29  | 116.14  | 100.52  | 624.9   | 57.40    | 581.28  | 189.17  | 168.15  | 201.33  |         |        |
| 1473031.1 | membrane protein, CD1201                                      | 1.10 | 1.10 | 0.000000000  | 0.9999447   | 1.07      | 0.56 | 0.003024490  | 0.9999446   | 2.93      | 3.4  | 7.2475E-07   | 0.000000000 | 3.07        | 0.33 | 1.36306E-11 | 1.56657E-07  | 216.29      | 106.33  | 881.28  | 179.17  | 500.78  | 297.57  | 316.29  | 116.14  | 100.52  | 624.9   | 57.40    | 581.28  | 189.17  | 168.15  | 201.33  |         |        |
| 1420760.0 | h-rpc; downmodulated on epigallocatechin gallate              | 1.09 | 1.09 | 0.350032490  | 0.9999447   | 1.70      | 0.59 | 0.02162366   | 0.9999446   | 2.93      | 2.93 | 1.40173E-06  | 0.000000000 | 2.93        | 2.93 | 1.15519E-06 | 0.047328517  | 167.85      | 492.65  | 258.43  | 465.89  | 683.13  | 61.00   | 187.45  | 164.01  | 496.07  | 189.03  | 169.11   | 285.49  | 300.63  | 663.13  | 664.00  | 650.12  |        |
| 1435323.0 | membrane bound O-acetyltransferase domain Mbcat1              | 1.51 | 1.51 | 0.001939004  | 0.9999447   | 1.04      | 1.04 | 0.8837302    | 0.9999446   | 2.96      | 3.4  | 2.71599E-06  | 0.1262491   | 1.88        | 0.53 | 1.14304E-06 | 0.047423597  | 588.89      | 89.69   | 565.63  | 300.36  | 717.64  | 158.89  | 512.76  | 210.01  | 486.07  | 486.62  | 698.29   | 566.63  | 314.12  | 277.80  | 300.36  |         |        |
| 1458902.0 | human immunodeficiency virus type 1 env/hIVgag                | 1.18 | 1.18 | 0.85         | 0.082776909 | 0.9999447 | 2.96 | 2.96         | 7.87926E-05 | 0.9999446 | 2.96 | 2.96         | 1.90789E-06 | 0.08521397  | 6.89 | 6.89        | 1.54321E-14  | 6.93956E-10 | 511.75  | 1514.44 | 186.00  | 1281.56 | 567.64  | 511.75  | 265.24  | 162.38  | 1410.71 | 213.29   | 186.00  | 162.75  | 1172.05 | 1369.32 | 1281.56 |        |
| 1471205.0 | protein tyrosine phosphatase SH-PTP2                          | 2.10 | 2.10 | 0.000000000  | 0.9999447   | 1.07      | 0.56 | 0.003024490  | 0.9999446   | 2.93      | 3.4  | 7.2475E-07   | 0.000000000 | 3.07        | 0.33 | 1.36306E-11 | 1.56657E-07  | 216.29      | 106.33  | 881.28  | 179.17  | 500.78  | 297.57  | 316.29  | 116.14  | 100.52  | 624.9   | 57.40    | 581.28  | 189.17  | 168.15  | 201.33  |         |        |
| 1448924.0 | hptecan (a megakaryocyte stimulating P14)                     | 1.11 | 1.11 | 0.1          | 0.7277708   | 0.9999447 | 1.24 | 0.80         | 0.1566271   | 0.9999446 | 2.96 | 2.96         | 3.10048E-06 | 0.000000000 | 2.66 | 2.66        | 1.00846E-05  | 3.53284E-05 | 112.82  | 335.58  | 140.20  | 372.81  | 149.29  | 112.82  | 68.96   | 362.37  | 309.79  | 123.92   | 144.99  | 140.20  | 162.75  | 361.59  | 394.55  | 372.81 |
| 1434690.0 | lysocardiolipin acyltransferase 1                             | 1.22 | 1.22 | 0.048400000  | 0.9999447   | 1.32      | 1.32 | 0.0593803    | 0.9999446   | 2.97      | 2.97 | 8.7245E-07   | 0.03901786  | 4.79        | 4.79 | 2.29438E-13 | 1.0231E-08   | 431.57      | 1282.74 | 35.82   | 1560.32 | 459.86  | 424.14  | 431.57  | 1335.57 | 1229.91 | 35.82   | 350.21   | 304.83  | 1482.99 | 1584.18 | 1560.32 |         |        |
| 1422824.0 | RIKEN GDNA B43042717 gene                                     | 1.13 | 1.13 | 0.4453040    | 0.9999447   | 1.50      | 1.50 | 0.09398422   | 0.9999446   | 2.98      | 2.98 | 1.7348E-06   | 0.007707277 | 5.04        | 5.04 | 6.64322E-10 | 2.8957E-05   | 28.80       | 86.53   | 19.17   | 96.73   | 34.95   | 28.80   | 26.35   | 90.40   | 81.26   | 19.17   | 16.55    | 35.49   | 86.67   | 96.73   | 90.40   |         |        |
| 1434741.0 | CD83 antigen                                                  | 1.13 | 1.13 | 0.000000000  | 0.9999447   | 1.07      | 0.56 | 0.003024490  | 0.9999446   | 2.93      | 3.4  | 7.2475E-07   | 0.000000000 | 3.07        | 0.33 | 1.36306E-11 | 1.56657E-07  | 216.29      | 106.33  | 881.28  | 179.17  | 500.78  | 297.57  | 316.29  | 116.14  | 100.52  | 624.9   | 57.40    | 581.28  | 189.17  | 168.15  | 201.33  |         |        |
| 1446602.0 | CD81 antigen                                                  | 1.26 | 1.26 | 0.065800400  | 0.9999447   | 1.96      | 1.96 | 0.0142305    | 0.9999446   | 2.98      | 3.4  | 8.58565E-05  | 0.000000000 | 1.20        | 0.83 | 0.0242345   | 0.9999933    | 62.19       | 21.06   | 31.78   | 26.38   | 81.89   | 62.19   | 38.58   | 18.1    | 33.81   | 23.81   | 52.80    | 27.3    | 21.06   | 24.98   | 26.38   |         |        |
| 1416330.0 | CD81 antigen                                                  | 1.27 | 1.27 | 0.01319165   | 0.9999447   | 1.38      | 0.72 | 0.00605439   | 0.9999446   | 2.99      | 2.99 | 2.26993E-07  | 0.00118337  | 2.75        | 2.75 | 9.60454E-12 | 4.24761E-07  | 546.93      | 1636.62 | 75.60   | 2075.08 | 546.93  | 578.59  | 435.72  | 1691.88 | 1581.38 | 786.87  | 729.35   | 75.60   | 2179.13 | 2075.08 | 1926.09 |         |        |
| 1415857.0 | embryonic stem cell containing 1                              | 1.30 | 1.30 | 0.00730414   | 0.9999447   | 1.54      | 1.54 | 0.00622277   | 0.9999446   | 2.99      | 2.99 | 0.41995E-06  | 0.001820329 | 3.54        | 0.28 | 3.3067E-15  | 1.40427E-10  | 3600.74     | 1203.29 | 5541.86 | 1564.13 | 3521.97 | 1291.73 | 5541.86 | 1564.13 | 3521.97 | 1291.73 | 5541.86  | 1564.13 | 3521.97 | 1291.73 | 5541.86 |         |        |
| 1436491.0 | CDNA clone IMAGE57447                                         | 1.10 | 1.10 | 0.91         | 0.321333    | 0.9999447 | 1.51 | 0.51         | 0.0463863   | 0.9999446 | 3.00 | 3.00         | 4.91874E-07 | 0.00201283  | 1.94 | 0.48        | 1.39877E-08  | 0.005002224 | 1843.45 | 160.67  | 1218.10 | 558.32  | 3841.95 | 907.13  | 1380.64 | 672.33  | 560.00  | 6541.38  | 5093.10 | 5218.01 | 540.32  | 558.32  | 594.30  |        |
| 1438045.0 | early endosome antigen 1                                      | 1.04 | 1.04 | 1.42         | 0.005142293 | 0.9999447 | 1.06 | 1.06         | 0.0680001   | 0.9999446 | 3.00 | 3.00         | 5.40984E-06 | 0.2400901   | 4.50 | 4.50        | 8.88882E-12  | 8.8844E-07  | 116.90  | 352.05  | 110.55  | 497.25  | 137.19  | 116.90  | 84.00   | 374.18  | 329.84  | 110.55   | 115.84  | 84.00   | 500.72  | 497.25  | 484.81  |        |
| 1459096.0 | CD38 antigen                                                  | 1.31 | 1.31 | 0.07125393   | 0.9999447   | 1.14      | 1.14 | 0.1557796    | 0.9999446   | 3.03      | 3.03 | 2.24229E-06  | 0.001074755 | 2.64        | 2.64 | 1.14181E-09 | 3.46652E-05  | 10.53       | 32.29   | 9.27    | 48.47   | 8.23    | 11.00   | 10.53   | 27.08   | 37.71   | 9.27    | 8.68     | 9.83    | 22.08   | 34.65   | 24.47   |         |        |
| 1437471.0 | CD38 antigen                                                  | 1.13 | 1.13 | 0.89         | 0.1543626   | 0.9999447 | 1.57 | 0.60         | 0.01159648  | 0.9999446 | 3.05 | 3.05         | 4.11777E-06 | 0.1833273   | 1.62 | 1.62        | 0.00680738   | 0.9999933   | 98.34   | 301.15  | 164.68  | 98.34   | 98.34   | 103.92  | 91.03   | 313.83  | 286.47  | 98.34    | 289.82  | 286.47  | 286.47  |         |         |        |
| 1455244.0 | dishevelled associated activator of morpho Dsm1               | 1.41 | 1.41 | 0.00126381   | 0.9999447   | 1.30      | 0.77 | 0.0562735    | 0.9999446   | 3.06      | 3.06 | 0.31915E-06  | 0.09783701  | 2.82        | 0.35 | 3.01852E-10 | 1.30205E-05  | 305.72      | 100.11  | 398.69  | 141.49  | 380.7   | 305.72  | 227.26  | 97.13   | 103.09  | 398.69  | 439.4    | 377.65  | 152.46  | 134.35  | 141.49  |         |        |
| 1418003.0 | RIKEN GDNA I190022423R gene                                   | 1.17 | 1.17 | 0.08019653   | 0.9999447   | 1.10      | 1.10 | 0.1407296    | 0.9999446   | 3.06      | 3.06 | 0.79899E-06  | 0.0358883   | 2.38        | 0.42 | 1.86071E-06 | 0.000976758  | 432.62      | 140.32  | 396.94  | 165.43  | 331.17  | 432.62  | 447.42  | 163.47  | 122.67  | 143.48  | 381.48   | 393.69  | 190.86  | 165.43  | 165.43  |         |        |
| 1426484.0 | cysteinine proteinase-3                                       | 1.03 | 1.03 | 1.9200776    | 0.00203034  | 3.50      | 3.50 | 2.958983E-06 | 0.00255125  | 3.06      | 3.06 | 2.48599E-06  | 0.1110956   | 1.53        | 0.26 | 2.45999E-06 | 1.9999993    | 83.90       | 257.31  | 294.02  | 450.00  | 83.90   | 83.90   | 74.20   | 273.97  | 240.84  | 411.80  | 294.02   | 450.00  | 450.00  | 426.84  |         |         |        |
| 1456290.0 | programmed cell death 1 ligand 2                              | 1.73 | 1.73 | 8.5345E-05   | 0.9999447   | 2.16      | 0.46 | 2.28232E-05  | 0.9768773   | 3.07      | 3.07 | 3.14718E-06  | 0.1440526   | 2.46        | 2.46 | 4.01828E-06 | 0.0422334    | 67.23       | 207.00  | 144.88  | 357.01  | 72.70   | 67.23   | 55.38   | 219.61  | 194.38  | 144.88  | 155.38   | 38.78   | 379.83  | 332.83  | 357.01  |         |        |
| 1438635.0 | RIKEN GDNA B93004174R gene                                    | 1.66 | 1.66 | 0.00011897   | 0.9999447   | 1.28      | 1.28 | 0.0527394    | 0.9999446   | 3.08      | 3.08 | 0.73034E-07  | 0.0345796   | 1.45        | 0.69 | 0.1015712   | 0.9999933    | 247.19      | 80.40   | 103.27  | 325.80  | 214.81  | 247.19  | 83.10   | 17.00   | 158.26  | 192.77  | 216.13   | 118.83  | 132.7   | 151.31  | 158.26  |         |        |
| 1448448.0 | gamma-glutamyltransferase 1                                   | 4.04 | 4.04 | 0.23495E-12  | 1.00988E-07 | 4.04      | 2.05 | 1.62479E-09  | 0.77983E-05 | 3.11      | 3.11 | 0.511928E-06 | 0.2291899   | 2.13        | 0.47 | 7.14549E-06 | 0.000000467  | 87.25       | 28.59   | 352.81  | 86.75   | 83.22   | 89.80   | 87.25   | 34.12   | 23.05   | 352.81  | 28.59    | 352.81  | 350.72  | 157.73  | 165.75  | 167.73  |        |
| 1435657.0 | RIKEN GDNA I13005206R gene                                    | 1.19 | 1.19 | 0.2311498    | 0.9999447   | 1.23      | 1.23 | 0.0216106    | 0.9999446   | 3.12      | 3.12 | 0.9651E-06   | 0.0466783   | 2.12        | 0.47 | 4.49312E-10 | 1.9621E-05   | 2096.51     | 67.30   | 1697.70 | 800.20  | 3346.04 | 2096.51 | 1866.40 | 712.96  | 633.64  | 1891.86 | 1548.26  | 1697.70 | 769.64  | 800.20  | 816.32  |         |        |
| 1428736.0 | GRAM domain containing 3                                      | 1.25 | 1.25 | 0.400104023  | 0.9999447   | 1.25      | 0.80 | 0.0283659    | 0.9999446   | 3.14      | 3.14 | 0.81185E-08  | 0.00061038  | 2.74        | 0.37 | 1.42332E-11 | 8.8844E-07   | 1419.37     | 451.65  | 167.96  | 365.15  | 1493.37 | 1515.25 | 1210.98 | 448.44  | 454.86  | 1767.96 | 1733.73  | 1862.54 | 591.95  | 766.21  | 685.10  |         |        |
| 1448613.0 | extracellular matrix protein 1                                | 1.01 | 1.01 | 0.8406E-09   | 0.00053728  | 1.39      | 0.72 | 0.01410339   | 0.9999446   | 3.18      | 3.18 | 2.36148E-07  | 0.000000000 | 4.81        | 4.81 | 1.94032E-13 | 6.24641E-09  | 276.15      | 865.65  | 365.33  | 645.38  | 209.83  | 243.20  | 209.83  | 209.83  | 320.07  | 365.33  | 365.33</ |         |         |         |         |         |        |

|           |                                                           |              |      |      |              |            |          |      |             |             |          |      |             |               |              |             |              |             |             |             |         |         |        |        |         |         |         |         |         |         |         |         |         |         |        |        |
|-----------|-----------------------------------------------------------|--------------|------|------|--------------|------------|----------|------|-------------|-------------|----------|------|-------------|---------------|--------------|-------------|--------------|-------------|-------------|-------------|---------|---------|--------|--------|---------|---------|---------|---------|---------|---------|---------|---------|---------|---------|--------|--------|
| 1423543.0 | CysH70 protein                                            | Cswp70       | 1.51 | 1.51 | 0.001038     | 0.999947   | 2.27     | 0.44 | 8.8811E-07  | 0.999944    | 4.62     | 4.62 | 3.27619E-09 | 0.00014761    | 3.07         | 3.07        | 1.17718E-08  | 0.00055745  | 55.78       | 25.71       | 126.77  | 389.54  | 61.23  | 55.78  | 53.91   | 255.28  | 260.13  | 87.78   | 173.52  | 126.77  | 360.74  | 390.20  | 389.54  |         |        |        |
| 1419202.0 | cytochrome P1 (hepocytosis)                               | CywP1        | 1.78 | 1.78 | 2.41122E-07  | 0.01052523 | 2.81     | 0.38 | 1.83929E-07 | 0.00278081  | 4.64     | 4.64 | 3.07587E-09 | 0.000186565   | 2.95         | 2.95        | 6.07587E-07  | 1.44977E-07 | 17.27       | 79.48       | 48.11   | 141.77  | 21.87  | 159.45 | 204.46  | 74.82   | 457.77  | 640.04  | 84.13   | 173.52  | 141.77  | 1577.84 | 1412.51 |         |        |        |
| 1418126.0 | chemokine (C-C motif) ligand 5                            | Cx5c         | 1.95 | 1.95 | 4.73261E-06  | 0.1992242  | 4.24     | 0.24 | 8.98556E-11 | 4.03361E-06 | 4.65     | 4.65 | 0.21        | 5.841E-10     | 0.00254904   | 10.09       | 0.10         | 1E-35       | 1E-35       | 631.87      | 136.67  | 267.63  | 683.63 | 631.87 | 452.84  | 733.39  | 17.32   | 107.02  | 2806.29 | 267.63  | 2615.80 | 284.24  | 265.45  | 265.44  |        |        |
| 1439788.0 | sema domain, immunoglobulin domain (G) Semaf4             | Scwf4        | 1.11 | 1.11 | 0.4055854    | 0.999947   | 4.25     | 1.25 | 4.46282E-23 | 0.999944    | 4.66     | 4.66 | 0.21        | 2.77558E-08   | 0.001246286  | 3.35        | 0.30         | 3.79719E-12 | 1.68322E-07 | 807.96      | 137.67  | 677.72  | 193.30 | 807.96 | 81.62   | 990.33  | 17.32   | 174.42  | 71.93   | 623.21  | 644.72  | 193.30  | 184.19  | 194.10  |        |        |
| 1415674.0 | Wnt5c, non-tyrosine regulated gene 1                      | Wnt5c1       | 0.48 | 0.48 | 0.0000000    | 0.999947   | 1.00     | 0.21 | 1.46037E-08 | 0.999944    | 4.66     | 4.66 | 1.14007E-08 | 0.0171745E-07 | 5.00         | 5.00        | 4.19097E-07  | 0.000000000 | 146.70      | 16.30       | 146.70  | 16.30   | 146.70 | 16.30  | 146.70  | 16.30   | 146.70  | 16.30   | 146.70  | 16.30   | 146.70  | 16.30   | 146.70  | 16.30   |        |        |
| 1454501.0 | Wnt5c-like 2 (Drosophila)                                 | Wnt5c2       | 1.16 | 1.16 | 0.131479     | 0.999949   | 1.09     | 0.09 | 0.0717254   | 0.999944    | 4.68     | 4.68 | 4.83069E-09 | 0.000387857   | 4.34         | 4.34        | 8.96261E-12  | 3.96452E-07 | 15.21       | 239.83      | 46.90   | 205.40  | 67.53  | 51.12  | 41.15   | 257.73  | 221.93  | 59.37   | 46.90   | 65.99   | 205.40  | 219.92  | 188.04  | 188.04  |        |        |
| 1435244.0 | vav oncogene                                              | Vav2         | 1.52 | 1.52 | 0.000175879  | 0.999947   | 1.32     | 0.76 | 0.0521444   | 0.999944    | 4.68     | 4.68 | 5.06268E-09 | 0.000237654   | 5.59         | 5.59        | 2.90878E-11  | 1.29638E-08 | 39.47       | 184.72      | 51.97   | 290.69  | 44.58  | 39.47  | 30.60   | 188.04  | 41.70   | 51.97   | 63.67   | 290.69  | 328.09  | 267.83  | 267.83  |         |        |        |
| 1448412.0 | Transcribed locus                                         |              | 1.64 | 1.64 | 0.001333641  | 0.999947   | 1.01     | 0.99 | 0.0617498   | 0.999944    | 4.71     | 4.71 | 2.87427E-07 | 0.01288928    | 2.90         | 2.90        | 3.95276E-05  | 0.9999933   | 291.29      | 62.04       | 294.36  | 10.54   | 582.48 | 227.96 | 291.29  | 62.04   | 294.36  | 10.54   | 582.48  | 227.96  | 291.29  | 62.04   | 294.36  | 10.54   |        |        |
| 1444040.0 | leukocyte-associated i-gk receptor 1                      | Lair1        | 1.77 | 1.77 | 0.000773911  | 0.999947   | 1.84     | 0.51 | 0.00018438  | 0.999944    | 4.86     | 4.86 | 0.21        | 3.96727E-08   | 0.001978326  | 5.33        | 0.19         | 1.44172E-12 | 6.40433E-08 | 192.28      | 39.64   | 373.57  | 70.15  | 20.86  | 192.28  | 136.05  | 36.63   | 42.67   | 144.16  | 294.36  | 11.13   | 10.54   | 96.67   | 96.67   |        |        |
| 1417654.0 | syndecan 4                                                | Sdc4         | 1.59 | 0.63 | 0.0005412    | 0.999947   | 1.41     | 0.71 | 0.0318369   | 0.999944    | 4.90     | 4.90 | 1.60448E-08 | 0.000720244   | 2.19         | 2.19        | 1.579864E-06 | 0.3257565   | 43.41       | 218.99      | 61.25   | 134.17  | 51.13  | 41.36  | 43.41   | 270.33  | 167.68  | 75.94   | 61.25   | 55.65   | 113.89  | 134.17  | 136.05  | 136.05  |        |        |
| 1418507.0 | suppressor of cytokine signaling 2                        | Sox2         | 1.49 | 1.49 | 0.000194438  | 0.999947   | 2.06     | 0.49 | 2.53357E-08 | 0.999944    | 4.96     | 4.96 | 4.15504E-09 | 0.000186266   | 5.96         | 4.96        | 1.40041E-12  | 3.19122E-07 | 145.88      | 79.42       | 300.55  | 107.01  | 145.88 | 155.86 | 121.28  | 860.85  | 609.59  | 300.55  | 356.95  | 269.34  | 1215.89 | 1076.01 | 1066.02 | 1066.02 |        |        |
| 1418508.0 | integrin alpha 5, epithelial-associated                   | Itga5        | 1.41 | 1.41 | 0.0000000    | 0.999947   | 1.00     | 0.00 | 0.0000000   | 0.999944    | 4.96     | 4.96 | 1.10000E-08 | 0.000000000   | 5.00         | 5.00        | 1.10000E-08  | 0.000000000 | 50.00       | 1.00        | 50.00   | 1.00    | 50.00  | 1.00   | 50.00   | 1.00    | 50.00   | 1.00    | 50.00   | 1.00    | 50.00   | 1.00    | 50.00   | 1.00    |        |        |
| 1428357.0 | RIKEN cDNA 261010F03 gene                                 | 261010F03Rik | 1.09 | 1.09 | 0.0          | 0.428793   | 0.999947 | 1.00 | 1.00        | 0.678274    | 0.999944 | 5.05 | 5.05        | 0.20          | 1.20561E-10  | 5.42285E-06 | 4.00         | 0.22        | 2.44429E-15 | 1.09472E-10 | 151.76  | 30.04   | 151.76 | 30.04  | 151.76  | 30.04   | 151.76  | 30.04   | 151.76  | 30.04   | 151.76  | 30.04   | 151.76  | 30.04   |        |        |
| 1427040.0 | MyoD family bHLH protein containing MIM2                  | MyoD         | 1.03 | 1.03 | 0.635043     | 0.999947   | 2.03     | 0.49 | 2.73255E-05 | 0.999944    | 5.08     | 5.08 | 5.08        | 1.6885E-09    | 7.49814E-06  | 2.57        | 2.57         | 5.14798E-10 | 1.09427E-05 | 281.33      | 1429.84 | 571.43  | 346.10 | 281.33 | 1429.84 | 571.43  | 346.10  | 281.33  | 1429.84 | 571.43  | 346.10  | 281.33  | 1429.84 | 571.43  | 346.10 |        |
| 1437745.0 | chromodomain helicase DNA binding protein Cht7            | Cht7         | 2.43 | 2.43 | 1.77399E-07  | 0.00775852 | 1.43     | 0.53 | 0.0290362   | 0.999944    | 5.20     | 5.20 | 0.19        | 2.15505E-08   | 0.0002112689 | 1.31        | 0.76         | 0.0161861   | 0.9999993   | 579.88      | 112.74  | 355.10  | 270.31 | 802.17 | 579.88  | 433.15  | 129.80  | 95.68   | 355.10  | 335.85  | 526.12  | 270.31  | 268.02  | 344.27  | 344.27 |        |
| 1416021.0 | fatty acid binding protein 5, epididymal testis           | Fabp5        | 1.34 | 1.34 | 0.0000000    | 0.999947   | 1.83     | 0.53 | 0.00378024  | 0.999944    | 5.23     | 5.23 | 1.82989E-08 | 0.000212327   | 3.83         | 3.83        | 4.80949E-13  | 2.14152E-08 | 485.93      | 2617.36     | 806.46  | 3408.84 | 485.93 | 701.06 | 355.7   | 324.03  | 1988.69 | 1136.13 | 890.46  | 802.17  | 3962.39 | 3408.84 | 378.24  | 378.24  |        |        |
| 1433595.0 | nucleolar carrier family 3 (UDP-glucuronic acid) SLC35d1  | Slc35d1      | 1.08 | 1.08 | 0.0343208    | 0.999947   | 1.01     | 0.99 | 0.7275677   | 0.999944    | 5.24     | 5.24 | 5.24        | 2.65338E-09   | 0.000120209  | 4.82        | 4.82         | 3.32827E-14 | 1.48887E-09 | 196.24      | 20.90   | 196.24  | 20.90  | 196.24 | 20.90   | 196.24  | 20.90   | 196.24  | 20.90   | 196.24  | 20.90   | 196.24  | 20.90   | 196.24  | 20.90  |        |
| 1420686.0 | ectodermal-neutral core-1                                 | Enc1         | 1.22 | 1.22 | 0.76         | 0.00741339 | 0.999947 | 1.50 | 1.50        | 0.0118845   | 0.999944 | 5.28 | 5.28        | 0.19          | 5.44333E-07  | 2.44087E-05 | 4.65         | 0.22        | 1.39555E-13 | 6.22653E-06 | 1131.63 | 21.47   | 75.96  | 162.58 | 1131.63 | 1383.17 | 899.46  | 212.06  | 216.24  | 878.82  | 755.96  | 197.85  | 162.58  | 151.19  | 151.19 |        |
| 1418157.0 | T-cell lymphoma invasion and metastasis 1                 | Tiam1        | 1.32 | 1.32 | 0.001854279  | 0.999947   | 1.09     | 1.09 | 0.4891035   | 0.999944    | 5.28     | 5.28 | 1.23362E-10 | 5.54869E-06   | 7.61         | 7.61        | 4.19813E-16  | 2.98841E-11 | 215.80      | 217.89      | 375.64  | 285.48  | 413.60 | 410.86 | 290.91  | 2001.99 | 2349.78 | 456.56  | 367.80  | 2952.87 | 2912.87 | 2924.19 | 2924.19 |         |        |        |
| 1447198.0 | neuropilin 1                                              | Nrp1         | 1.19 | 1.19 | 0.84         | 0.0232874  | 0.999947 | 1.85 | 1.85        | 0.000675938 | 0.999944 | 5.37 | 5.37        | 7.15523E-08   | 3.121648E-06 | 8.34        | 8.34         | 1.32434E-14 | 5.00829E-10 | 173.50      | 93.87   | 93.79   | 783.48 | 173.50 | 93.87   | 146.60  | 1046.35 | 830.79  | 93.79   | 72.00   | 98.26   | 673.47  | 783.48  | 810.45  | 810.45 |        |
| 1442332.0 | nucleolar carrier family 3 (UDP-glucuronic acid) SLC35d1  | Slc35d1      | 1.22 | 1.22 | 0.8839942    | 0.999947   | 2.50     | 2.50 | 0.00059763  | 0.999944    | 5.42     | 5.42 | 0.19        | 1.22948E-08   | 0.05495775   | 2.63        | 0.38         | 3.23431E-07 | 0.0136569   | 657.78      | 121.52  | 262.78  | 809.39 | 657.78 | 121.52  | 262.78  | 809.39  | 657.78  | 121.52  | 262.78  | 809.39  | 657.78  | 121.52  | 262.78  | 809.39 |        |
| 1416529.0 | suppressor of cytokine signaling 2                        | Sox2         | 1.67 | 1.67 | 0.00130265   | 0.999947   | 1.77     | 1.77 | 0.00982057  | 0.999944    | 5.49     | 5.49 | 2.21934E-09 | 0.01392E-05   | 5.84         | 5.84        | 5.54802E-12  | 1.57313E-06 | 210.20      | 155.81      | 222.01  | 105.91  | 222.01 | 105.91 | 222.01  | 105.91  | 222.01  | 105.91  | 222.01  | 105.91  | 222.01  | 105.91  | 222.01  | 105.91  | 222.01 | 105.91 |
| 1438470.0 | suppressor of cytokine signaling 2                        | Sox2         | 1.48 | 1.48 | 0.0101559    | 0.999947   | 1.11     | 1.00 | 0.2247708   | 0.999944    | 5.49     | 5.49 | 1.48733E-09 | 6.63419E-06   | 7.28         | 7.28        | 1.75451E-14  | 7.8458E-10  | 16.84       | 92.49       | 17.86   | 136.22  | 20.17  | 16.84  | 12.03   | 90.82   | 94.35   | 17.78   | 18.76   | 21.04   | 105.4   | 154.04  | 136.22  | 136.22  |        |        |
| 1428530.0 | ketch-like 5 (Drosophila)                                 | Kht5         | 1.90 | 1.90 | 2.0788E-06   | 0.0887672  | 1.07     | 1.07 | 0.611284    | 0.999944    | 5.55     | 5.55 | 0.18        | 3.62951E-08   | 0.00016303   | 2.73        | 0.37         | 2.52934E-11 | 1.1159E-06  | 76.47       | 47.20   | 71.891  | 262.99 | 811.72 | 76.47   | 47.20   | 71.891  | 262.99  | 811.72  | 76.47   | 47.20   | 71.891  | 262.99  | 811.72  | 76.47  | 47.20  |
| 1442211.0 | RGM domain family, member B                               | Rgmb         | 1.35 | 1.35 | 0.4022801    | 0.999947   | 2.59     | 2.59 | 0.00010049  | 0.999944    | 5.57     | 5.57 | 0.18        | 3.68828E-08   | 0.001659846  | 1.59        | 0.63         | 0.000312973 | 0.9999993   | 98.83       | 17.79   | 38.09   | 23.98  | 108.19 | 98.83   | 67.48   | 19.40   | 16.54   | 52.48   | 38.09   | 31.19   | 23.98   | 20.93   | 24.4    | 24.4   |        |
| 1442222.0 | Epstein-Barr virus induced gene 3                         | Ebi3         | 1.93 | 1.93 | 0.101908E-05 | 0.4257916  | 3.14     | 0.32 | 1.32627E-06 | 0.0587701   | 5.63     | 5.63 | 5.63        | 3.80759E-08   | 0.00044224   | 5.45        | 3.45         | 3.80759E-08 | 1.06388E-05 | 66.12       | 381.68  | 207.65  | 71.751 | 53.61  | 63.97   | 66.12   | 465.74  | 29.72   | 175.38  | 220.64  | 207.65  | 74.134  | 613.39  | 71.751  | 71.751 |        |
| 1418203.0 | phorbol-12-myristate-13-acetate-inducible protein 1       | Pmaip1       | 1.13 | 1.13 | 0.357011     | 0.999947   | 6.86     | 0.15 | 5.27970E-11 | 2.37041E-06 | 5.72     | 5.72 | 1.82944E-09 | 8.22051E-06   | 1.06         | 0.94        | 0.7628199    | 0.9999993   | 28.37       | 163.37      | 184.51  | 183.17  | 28.37  | 28.82  | 18.4    | 143.99  | 182.75  | 14.34   | 247.70  | 134.84  | 185.92  | 170.38  | 183.17  | 183.17  |        |        |
| 1450061.0 | ectodermal-neutral core-1                                 | Enc1         | 1.11 | 1.11 | 0.90         | 0.321056   | 0.999947 | 1.65 | 1.65        | 0.0037151   | 0.999944 | 5.74 | 5.74        | 0.42481E-10   | 1.09999E-05  | 3.87        | 0.28         | 9.35359E-13 | 4.18944E-08 | 110.86      | 19.24   | 67.43   | 107.01 | 110.86 | 110.86  | 62.91   | 61.48   | 172.00  | 73.70   | 673.00  | 635.50  | 195.95  | 190.70  | 173.92  | 173.92 |        |
| 1445742.0 | zinc finger, CCH2-type, containing 12C                    | Zfp12c       | 1.12 | 1.12 | 0.0000000    | 0.999947   | 1.91     | 1.91 | 0.0000000   | 0.999944    | 5.74     | 5.74 | 0.0000000   | 0.000000000   | 1.91         | 1.91        | 0.0000000    | 0.000000000 | 12.00       | 19.81       | 12.00   | 19.81   | 12.00  | 19.81  | 12.00   | 19.81   | 12.00   | 19.81   | 12.00   | 19.81   | 12.00   | 19.81   | 12.00   | 19.81   |        |        |
| 1455034.0 | nuclear receptor subfamily 4, group A, member 4           | Nr4a4        | 2.93 | 2.93 | 3.23274E-08  | 0.00102302 | 1.06     | 1.06 | 0.3891033   | 0.999944    | 5.85     | 5.85 | 1.36595E-10 | 6.14338E-06   | 2.11         | 2.11        | 1.07979E-06  | 0.00447211  | 12.23       | 71.62       | 11.59   | 24.42   | 12.25  | 12.23  | 8.36    | 68.49   | 17.74   | 15.11   | 11.59   | 10.40   | 25.65   | 23.62   | 24.42   | 24.42   |        |        |
| 1455917.0 | neurotrophin tyrosine kinase, receptor, tyrosine kinase 3 | Ntrk3        | 1.30 | 1.30 | 0.4395826    | 0.999947   | 2.14     | 2.14 | 0.00081314  | 0.999944    | 5.98     | 5.98 | 0.17        | 0.65395       |              |             |              |             |             |             |         |         |        |        |         |         |         |         |         |         |         |         |         |         |        |        |
