# Supplementary material
Source: PubMed Central journal article supplement (PMC11028993)
Supplement: 262_2010_918_MOESM3_ESM.pdf [file 262_2010_918_MOESM3_ESM.pdf]

|              |                                                               |                      |      |      |             |              |      |      |             |             |           |      |             |             |           |      |             |             |           |         |         |         |         |         |         |        |        |         |         |         |         |         |         |        |
|--------------|---------------------------------------------------------------|----------------------|------|------|-------------|--------------|------|------|-------------|-------------|-----------|------|-------------|-------------|-----------|------|-------------|-------------|-----------|---------|---------|---------|---------|---------|---------|--------|--------|---------|---------|---------|---------|---------|---------|--------|
| 1417397_at   | solute carrier family 9 (iodine/hydrogen exchanger)           | Slc9a1               | 2.30 | 2.30 | 1.07546E-07 | 0.004718274  | 1.06 | 1.00 | 0.8504508   | 0.9999446   | 2.03      | 0.49 | 0.000424035 | 0.9999979   | 1.20      | 1.20 | 0.3503743   | 0.9999933   | 285.27    | 140.26  | 267.91  | 322.00  | 285.27  | 294.16  | 251.36  | 138.35 | 141.18 | 260.81  | 267.91  | 327.34  | 275.59  | 322.00  | 345.46  |        |
| 1451672_at   | G protein-coupled receptor kinase 6                           | Grk6                 | 2.29 | 2.29 | 3.37057E-08 | 0.001487937  | 1.02 | 1.02 | 0.46643E-05 | 0.9999979   | 2.04      | 0.49 | 3.46643E-05 | 0.9999979   | 1.14      | 1.14 | 0.3782717   | 0.9999933   | 1938.86   | 948.85  | 1896.44 | 2173.74 | 2329.78 | 1938.86 | 1747.24 | 968.77 | 938.93 | 1331.93 | 1896.44 | 2435.34 | 1734.58 | 2194.41 | 2173.74 |        |
| 1451174_at   | leucine rich repeat containing 33                             | Lrrc3                | 2.12 | 2.12 | 3.24826E-08 | 0.001434774  | 1.17 | 1.05 | 0.1659387   | 0.9999446   | 2.07      | 0.48 | 6.02132E-05 | 0.9999979   | 1.15      | 0.87 | 0.04910279  | 0.9999933   | 1177.53   | 569.53  | 1380.56 | 1202.29 | 1347.82 | 1130.84 | 1177.53 | 605.38 | 638.53 | 1258.73 | 1380.56 | 1761.39 | 1198.23 | 1202.29 | 1286.78 |        |
| 1420204_at   | cytoplasmic FMR1 interacting protein 2                        | Cyflp2               | 3.47 | 0.29 | 1.54899E-09 | 6.80126E-05  | 1.06 | 0.95 | 0.6528004   | 0.9999446   | 2.08      | 2.08 | 0.04831929  | 0.9999979   | 1.76      | 0.57 | 0.004883928 | 0.9999933   | 74.69     | 156.04  | 78.82   | 44.75   | 74.69   | 171.30  | 56.82   | 166.11 | 127.98 | 140.97  | 45.84   | 74.82   | 49.88   | 44.75   | 39.62   |        |
| 1449273_at   | Transcribed locus                                             |                      | 3.27 | 3.27 | 1.70291E-08 | 0.000763534  | 1.14 | 0.88 | 0.8833664   | 0.9999446   | 2.10      | 0.48 | 0.002670073 | 0.9999979   | 1.37      | 1.37 | 0.1014417   | 0.9999933   | 440.97    | 226.32  | 452.76  | 462.45  | 781.28  | 354.83  | 440.97  | 309.50 | 143.14 | 389.52  | 503.93  | 607.70  | 622.84  | 688.15  | 723.97  |        |
| 1443938_at   | Transcribed locus                                             |                      | 2.38 | 0.42 | 1.35846E-07 | 0.0059453    | 1.20 | 1.20 | 0.0236442   | 0.9999446   | 2.11      | 2.11 | 0.002225582 | 0.9999979   | 1.06      | 1.06 | 0.4803877   | 0.9999933   | 9.61      | 20.36   | 8.04    | 8.50    | 9.61    | 15.47   | 9.10    | 22.48  | 18.24  | 9.22    | 6.79    | 8.04    | 8.05    | 8.91    | 8.50    |        |
| 1434278_at   | X-linked myotubular myopathy gene 1                           | Mym1                 | 2.50 | 2.50 | 1.07941E-09 | 5.71756E-05  | 1.03 | 0.97 | 0.000680901 | 0.9999446   | 2.11      | 2.11 | 0.000680901 | 0.9999979   | 5.13      | 5.13 | 1.09579E-13 | 4.89138E-09 | 280.48    | 594.91  | 288.65  | 1479.83 | 238.33  | 349.37  | 280.48  | 649.16 | 540.67 | 288.65  | 300.19  | 229.63  | 1338.72 | 1479.83 | 1615.51 |        |
| 1418105_at   | pumilio 2 (Drosophila)                                        | Pum2                 | 3.15 | 3.15 | 4.77614E-11 | 1.24102E-08  | 1.18 | 0.84 | 0.2487814   | 0.9999446   | 2.12      | 0.47 | 1.79439E-05 | 0.7969168   | 1.26      | 1.26 | 0.1039369   | 0.9999933   | 873.64    | 419.91  | 1034.96 | 1300.79 | 1100.65 | 812.76  | 873.64  | 341.43 | 488.40 | 1034.96 | 1129.66 | 1014.37 | 1250.09 | 1300.79 | 1433.69 |        |
| 1420275_at   | Transcribed locus                                             |                      | 2.32 | 2.32 | 8.39901E-08 | 0.003890355  | 1.18 | 0.85 | 0.6983222   | 0.9999446   | 2.12      | 0.47 | 0.00222454  | 0.9999979   | 1.08      | 0.83 | 0.6460322   | 0.9999933   | 218.55    | 103.16  | 257.05  | 299.00  | 299.00  | 204.60  | 218.55  | 105.32 | 101.60 | 257.05  | 215.81  | 215.81  | 294.63  | 226.83  | 256.73  | 238.98 |
| 1420275_s1   | Transcribed locus                                             |                      | 2.63 | 0.38 | 7.69525E-08 | 0.003345373  | 1.17 | 0.85 | 0.4583844   | 0.9999446   | 2.12      | 0.47 | 0.00705667  | 0.9999979   | 1.45      | 0.69 | 0.00437211  | 0.9999933   | 80.72     | 174.43  | 94.46   | 65.10   | 80.72   | 202.87  | 66.01   | 206.33 | 142.52 | 106.98  | 71.96   | 94.46   | 65.10   | 66.35   | 54.23   |        |
| 1419640_at   | purine rich element binding protein B                         | Purb                 | 3.45 | 3.45 | 1.45948E-10 | 6.54752E-06  | 1.15 | 1.15 | 0.2716684   | 0.9999446   | 2.16      | 0.46 | 7.99171E-05 | 0.9999979   | 1.84      | 1.84 | 0.00240156  | 0.9999933   | 543.47    | 257.96  | 375.33  | 867.41  | 664.58  | 514.49  | 543.47  | 316.21 | 199.71 | 293.33  | 471.33  | 691.24  | 867.41  | 785.90  | 905.26  |        |
| 1439746_at   | Wnk1 tyrosine kinase protein kinase 1                         | Wnk1                 | 4.34 | 4.34 | 1.85499E-08 | 0.002825459  | 1.05 | 0.96 | 0.9291789   | 0.9999446   | 2.18      | 2.18 | 0.01802787  | 0.9999979   | 8.04      | 9.04 | 6.66134E-16 | 2.88346E-11 | 253.97    | 655.47  | 265.59  | 2402.02 | 446.85  | 253.97  | 200.63  | 309.59 | 256.65 | 256.65  | 324.47  | 2506.84 | 2162.15 | 2402.02 |         |        |
| 1442528_at   | G protein pathway suppressor 2                                | Gps2                 | 2.27 | 2.27 | 1.70291E-08 | 0.000763534  | 1.14 | 0.88 | 0.8833664   | 0.9999446   | 2.10      | 0.48 | 0.002670073 | 0.9999979   | 1.37      | 1.37 | 0.1014417   | 0.9999933   | 440.97    | 226.32  | 452.76  | 462.45  | 781.28  | 354.83  | 440.97  | 309.50 | 143.14 | 389.52  | 503.93  | 607.70  | 622.84  | 688.15  | 723.97  |        |
| 1438206_at   | TAO kinase 2                                                  | Tao2                 | 3.82 | 3.82 | 5.95979E-10 | 1.429173E-05 | 1.08 | 0.93 | 0.1917419   | 0.9999446   | 2.20      | 0.45 | 0.001368778 | 0.9999979   | 1.61      | 1.61 | 0.05446591  | 0.9999933   | 138.71    | 64.87   | 145.73  | 240.67  | 143.01  | 97.66   | 138.71  | 49.29  | 80.46  | 102.51  | 149.73  | 284.83  | 196.47  | 260.7   | 262.71  |        |
| 1418975_at   | NCK interacting protein with SH3 domain                       | Nckipad4             | 2.07 | 2.07 | 1.97147E-07 | 0.008617903  | 1.15 | 1.15 | 0.45        | 0.000191955 | 0.9999979 | 2.21 | 0.45        | 0.000191955 | 0.9999979 | 1.07 | 1.07        | 0.04661066  | 0.9999933 | 139.21  | 62.89   | 121.27  | 129.67  | 158.75  | 139.21  | 117.62 | 61.27  | 110.16  | 121.27  | 138.23  | 196.97  | 141.46  | 129.17  |        |
| 1434743_x_at | RUN and SH3 domain containing 1                               | Ruac1                | 2.15 | 2.15 | 4.89444E-09 | 0.002021723  | 1.08 | 0.93 | 0.1093302   | 0.9999446   | 2.22      | 0.45 | 2.29517E-06 | 0.1024724   | 1.11      | 0.90 | 0.1313006   | 0.9999933   | 568.05    | 254.22  | 612.94  | 551.20  | 679.14  | 568.05  | 596.10  | 243.41 | 299.03 | 572.63  | 679.51  | 612.94  | 551.20  | 522.62  |         |        |
| 1442122_at   | Casitas B-lineage lymphoma-like 1                             | CBIL1                | 2.58 | 2.58 | 3.71763E-09 | 0.001438949  | 1.05 | 0.95 | 0.7904929   | 0.9999446   | 2.23      | 0.45 | 0.002867377 | 0.9999979   | 1.20      | 1.20 | 0.2362116   | 0.9999933   | 395.14    | 191.37  | 307.65  | 339.24  | 361.55  | 292.40  | 170.63  | 307.65 | 298.63 | 307.30  | 314.22  | 368.64  | 312.9   | 314.22  | 316.22  |        |
| 1420308_at   | VATPase, H+ transporting, lysosomal V1 subunit E1             | VATP1e1              | 3.14 | 0.32 | 1.31016E-09 | 5.85483E-05  | 1.19 | 0.84 | 0.874369    | 0.9999446   | 2.23      | 0.45 | 0.1712921   | 0.9999979   | 1.68      | 0.59 | 0.0009774   | 0.9999933   | 136.52    | 304.16  | 162.99  | 96.93   | 136.52  | 510.70  | 99.69   | 309.59 | 299.33 | 274.32  | 61.22   | 196.97  | 100.80  | 96.93   | 78.98   |        |
| 1451046_at   | zinc finger protein, multiple 1 - similar to FOG              | LOC100047651 : Zfpm1 | 3.11 | 3.11 | 1.72838E-10 | 7.743E-06    | 1.24 | 0.81 | 0.1956021   | 0.9999446   | 2.23      | 0.45 | 6.0437E-05  | 0.9999979   | 1.13      | 1.13 | 0.4022864   | 0.9999933   | 351.54    | 157.60  | 434.74  | 490.13  | 351.54  | 318.53  | 354.55  | 154.10 | 161.10 | 282.54  | 434.74  | 707.67  | 483.41  | 503.14  | 490.13  |        |
| 1428506_at   | 5-aminomidazole-4-carboxamide ribonucleotide formyl AIC       | FormylAIC            | 2.20 | 2.20 | 6.74119E-09 | 0.002907947  | 1.20 | 1.20 | 0.8006864   | 0.9999446   | 2.26      | 0.44 | 0.000101866 | 0.9999979   | 1.17      | 1.17 | 0.139815    | 0.9999933   | 1915.16   | 847.40  | 1800.14 | 1864.34 | 1915.16 | 1915.16 | 1833.74 | 842.86 | 851.95 | 1488.09 | 1800.14 | 1904.43 | 1902.73 | 1816.52 | 1864.34 |        |
| 1451778_at   | CREB regulated transcription coactivator 3 - similar to Crtc3 | LOC100047733         | 4.68 | 4.68 | 8.81915E-10 | 1.70913E-05  | 1.17 | 1.17 | 0.1102993   | 0.9999446   | 2.27      | 0.44 | 0.002635311 | 0.9999979   | 2.40      | 2.40 | 4.78634E-08 | 6.00020028  | 281.31    | 123.11  | 224.06  | 539.70  | 511.87  | 281.31  | 203.46  | 166.54 | 73.69  | 178.11  | 224.06  | 274.14  | 487.10  | 539.70  | 605.12  |        |
| 1450662_at   | testis specific protein kinase 1                              | Tesk1                | 2.21 | 2.21 | 1.36551E-07 | 0.00598244   | 1.10 | 0.91 | 0.219452    | 0.9999446   | 2.29      | 0.44 | 5.77203E-05 | 0.9999979   | 1.14      | 0.88 | 0.1619012   | 0.9999933   | 253.52    | 110.57  | 278.63  | 244.28  | 280.99  | 299.17  | 253.52  | 106.12 | 115.02 | 223.57  | 278.63  | 362.25  | 227.73  | 249.65  | 244.28  |        |
| 1438360_at   | Zinc finger and SCAN domain containing 22                     | Zscan22              | 2.11 | 2.11 | 1.09448E-07 | 0.004801023  | 1.10 | 0.91 | 0.8307329   | 0.9999446   | 2.31      | 0.43 | 1.6998E-05  | 0.7106462   | 1.21      | 0.82 | 0.3898968   | 0.9999933   | 252.16    | 109.47  | 278.46  | 229.51  | 316.96  | 235.16  | 225.44  | 98.89  | 120.05 | 205.10  | 278.46  | 286.62  | 224.92  | 229.51  | 236.67  |        |
| 1450113_at   | TBC1 domain family, member 25                                 | Tbc1d25              | 2.67 | 2.67 | 5.57187E-09 | 0.002453571  | 1.17 | 0.85 | 0.2237477   | 0.9999446   | 2.32      | 0.43 | 0.000100119 | 0.9999979   | 1.01      | 0.89 | 0.0554168   | 0.9999933   | 92.31     | 40.08   | 108.04  | 106.45  | 104.65  | 87.92   | 92.31   | 44.51  | 35.65  | 99.30   | 108.04  | 142.58  | 108.21  | 115.28  | 106.45  |        |
| 1449772_at   | TBC1 domain family, member 14                                 | Tbc1d14              | 3.65 | 0.28 | 1.28075E-08 | 0.000572501  | 1.07 | 0.84 | 0.2248866   | 0.9999446   | 2.32      | 0.43 | 0.002019722 | 0.9999979   | 1.63      | 0.61 | 0.04787437  | 0.9999933   | 74.58     | 176.35  | 79.57   | 48.71   | 74.58   | 169.23  | 62.04   | 206.91 | 144.38 | 85.90   | 50.22   | 79.57   | 62.59   | 48.71   | 44.37   |        |
| 1415886_at   | SH2 domain containing SC3                                     | Sh2c3                | 2.11 | 2.11 | 2.24231E-07 | 0.009793974  | 1.04 | 0.96 | 0.3741547   | 0.9999446   | 2.33      | 0.43 | 3.2529E-05  | 0.9999979   | 1.16      | 0.87 | 0.04123001  | 0.9999933   | 620.47    | 285.68  | 647.82  | 560.64  | 632.77  | 532.96  | 620.47  | 250.37 | 282.34 | 616.24  | 647.82  | 759.27  | 493.57  | 572.97  | 560.64  |        |
| 1431938_x_at | phosphomannomerase 2                                          | Pmm2                 | 2.14 | 2.14 | 1.42196E-07 | 0.006228994  | 1.19 | 0.84 | 0.2884899   | 0.9999446   | 2.36      | 0.42 | 1.46784E-05 | 0.6521023   | 1.31      | 0.76 | 0.002200402 | 0.9999933   | 644.84    | 273.32  | 765.48  | 584.25  | 745.41  | 598.11  | 644.84  | 280.59 | 296.05 | 712.69  | 768.48  | 788.23  | 543.26  | 584.25  | 600.84  |        |
| 1425136_x_at | dynamitin 2                                                   | Dnm2                 | 2.41 | 2.41 | 1.44484E-08 | 6.45152E-05  | 1.14 | 0.88 | 0.7891796   | 0.9999446   | 2.37      | 0.42 | 4.08971E-06 | 0.1822141   | 1.12      | 0.89 | 0.3181708   | 0.9999933   | 716.82    | 352.60  | 816.74  | 727.79  | 950.97  | 711.91  | 716.82  | 287.70 | 317.50 | 758.91  | 816.74  | 869.87  | 727.79  | 808.25  | 721.14  |        |
| 1426577_at   | filamin, alpha                                                | Flna                 | 2.43 | 2.43 | 2.18754E-08 | 0.00697637   | 1.01 | 1.01 | 0.6828821   | 0.9999446   | 2.38      | 0.42 | 2.16437E-06 | 0.06664784  | 1.03      | 1.03 | 0.7496408   | 0.9999933   | 2622.31   | 1104.05 | 2953.51 | 2677.14 | 2622.31 |         |         |        |        |         |         |         |         |         |         |        |
